# Supplementary material
Source: Springer Nature journal article supplement (https://www.springermedizin.de/resource/supplementary/12913_2007_653_MOESM1_ESM.pdf/9535896)

### Conditions

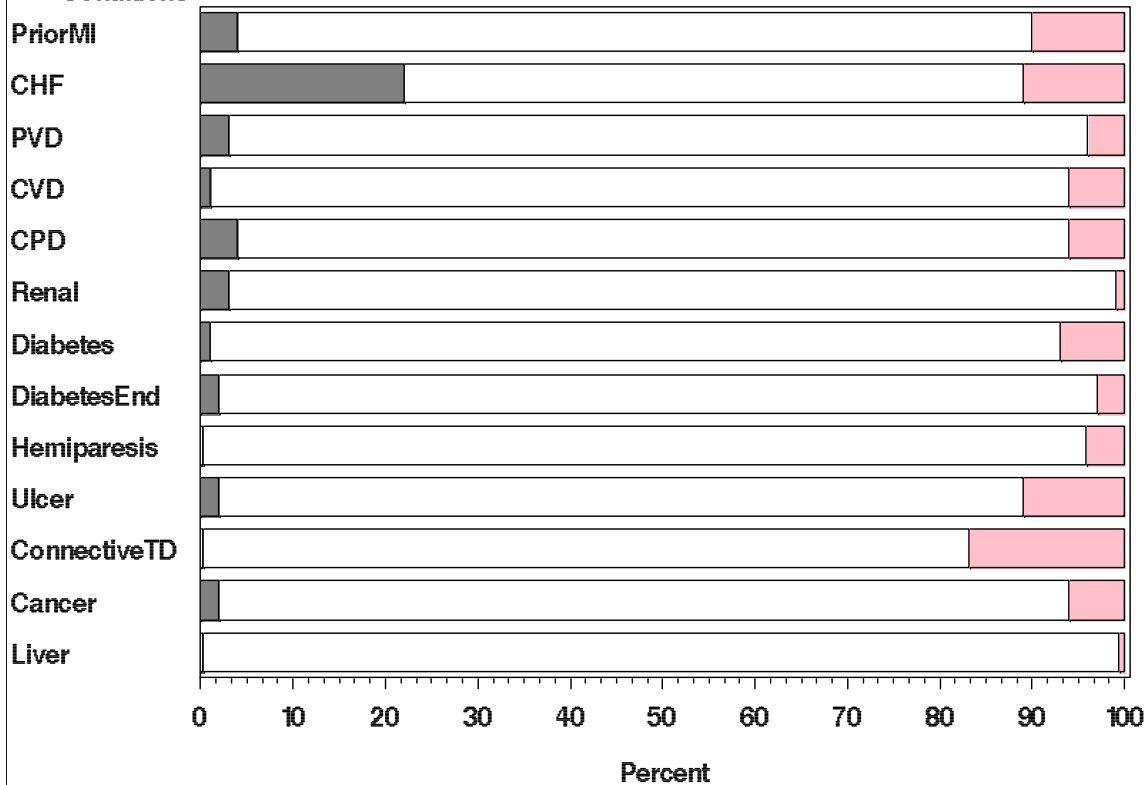

Legend

Charlson only

Concordance

Katz only

Supplement: MOESM1 [file 9535896]
